# Supplementary material for: CDX2 regulation by the RNA-binding protein MEX3A: impact on intestinal differentiation and stemness
Source: PubMed Central journal article supplement — Nucleic Acids Res. 2013 Feb 12;41(7):3986–99. doi: 10.1093/nar/gkt087 (PMC3627580; doi:10.1093/nar/gkt087), 2013-02-12
Supplement: supp_gkt087_nar-02982-x-2012-File012.pdf [file supp_gkt087_nar-02982-x-2012-File012.pdf]

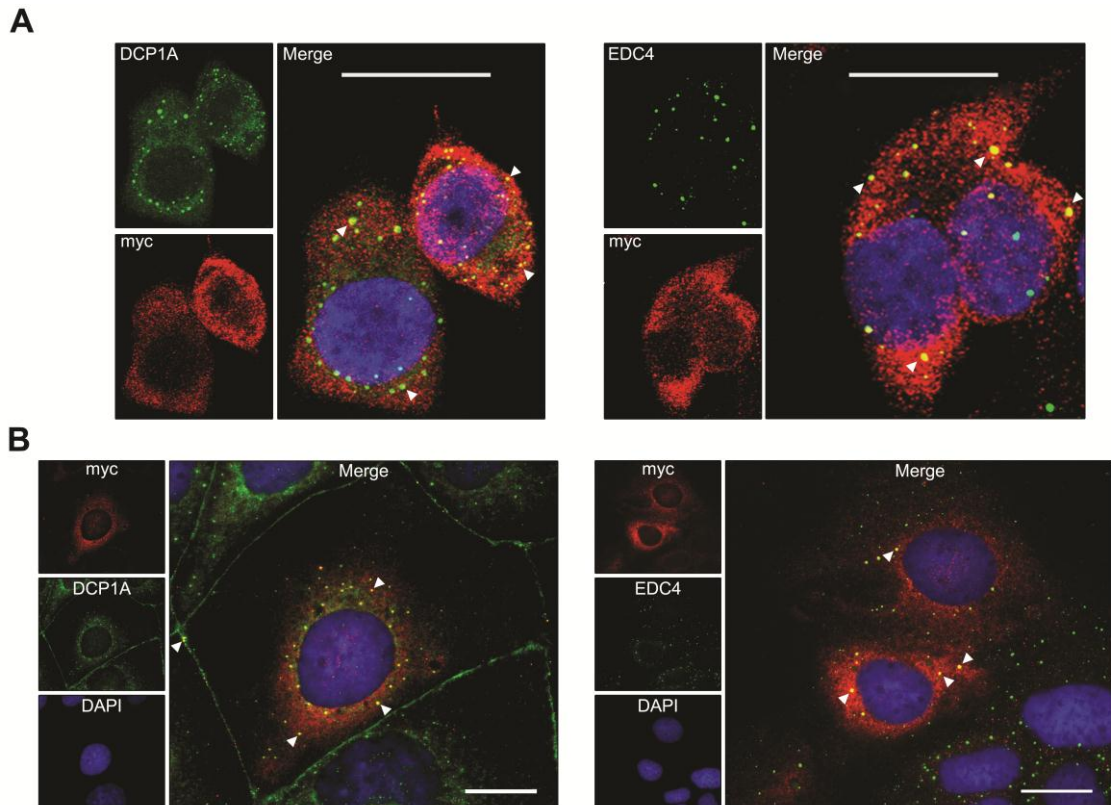

**Supplementary Figure S1.** Subcellular localization of MEX3A in P bodies **(A)** Immunofluorescence of MEX3A stably transfected AGS cells for myc-tag and for endogenous DCP1A and EDC4 proteins. **(B)** Immunofluorescence of MEX3A stably transfected Caco-2 cells for myc-tag and endogenous DCP1A and EDC4 proteins. White arrow-heads point to different sites of co-localization (original magnification, x630; scale bars 20  $\mu$ m).

**A**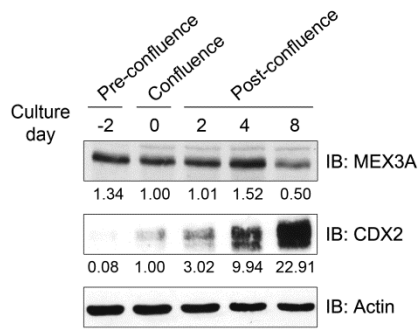**B**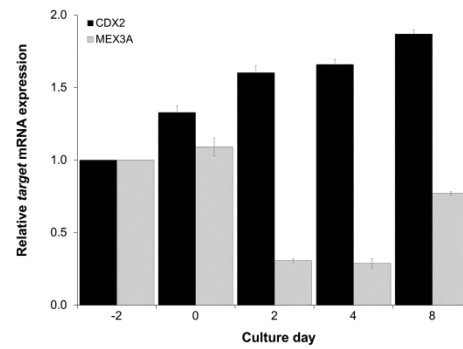

**Supplementary Figure S2.** Study of the expression profile of endogenous MEX3A in Caco-2 cells. **(A)** Western blot of MEX3A and CDX2 expression during Caco-2 differentiation. The time-point in which confluence is achieved is referred to as day 0 (culture day 6). **(B)** qPCR of *MEX3A* and *CDX2* mRNA expression during the same time-points. Values for *CDX2* and *MEX3A* at day -2 were referred to as 1.

***Pan troglodytes CDX2*** - One predicted MRE in the 3'UTR

| bp   | Sequence   |
|------|------------|
| 1991 | AGAGTTTTTA |

***Mus musculus Cdx2*** - Two predicted MREs in the CDS

| bp   | Sequence       |
|------|----------------|
| 873  | GGAGTTTCACTTTA |
| 1171 | GGAGGGGTTTTA   |

***Rattus norvegicus Cdx2*** - Three predicted MREs, one in the CDS and two in the 3'UTR

| bp   | Sequence         |
|------|------------------|
| 1010 | GGAGGGGTTTTA     |
| 1228 | TTAGATTTTTTTTTTA |
| 2027 | GGAGCTTTA        |

***Danio rerio cdx1a*** - One predicted MRE in the 3'UTR

| bp   | Sequence |
|------|----------|
| 1176 | TGAGTTTA |

***Xenopus laevis cdx2*** - Seven predicted MREs in the 3'UTR

| bp   | Sequence       |
|------|----------------|
| 1269 | ATAGACTTTTA    |
| 1640 | TTAGATCCCTTCTA |
| 1860 | GTAGCATTTTA    |
| 2251 | GTAGGCAGCCTTTA |
| 2355 | GGAGACGTTTA    |
| 2488 | TGAGTGTTTTATA  |
| 2546 | GGAGGATATATTTA |

***Drosophila melanogaster cad*** - Four predicted MREs in the 3'UTR

| bp   | Sequence         |
|------|------------------|
| 2235 | ATAGCCGCATATATA  |
| 2251 | AGAGTTTTAACGTTTA |
| 2298 | GTAGTTAATATA     |
| 2469 | ATAGCTATTTA      |

**Supplementary Figure S3.** Bioinformatics search for MREs in *CDX2* homologues of several species. Different MRE sequences located in the coding sequence (CDS) or 3'UTR of the transcripts are shown.

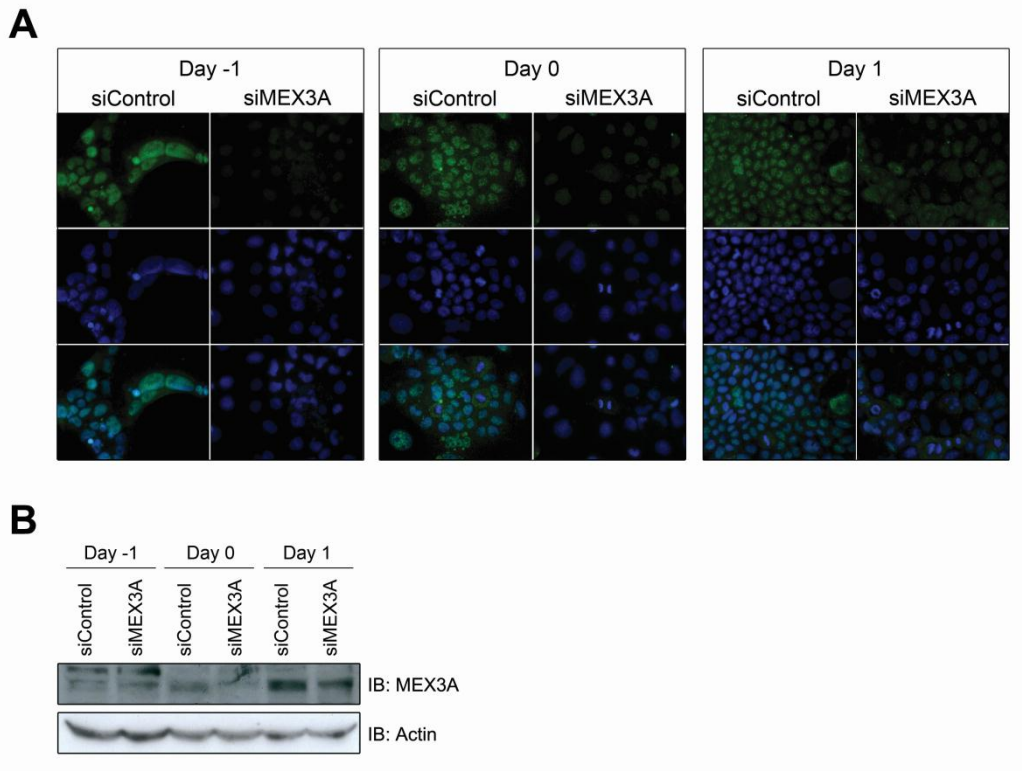

**Supplementary Figure S4.** Inhibition of endogenous MEX3A in Caco-2 cells. **(A)** Immunofluorescence for endogenous MEX3A at different time-points, upon inhibition with specific siRNAs for 24h (original magnification, x400; scale bar 20  $\mu$ m). **(B)** Corresponding western blot analysis of MEX3A downregulation.
